# Supplementary material
Source: MDPI journal article supplement (https://www.mdpi.com/2075-163X/11/3/322)
Supplement: s1 [file s1]

## Supplementary Materials:

**Table S1.** Thermodynamic functions of pseudowollastonite at different pressures and temperatures.

| $P$ ,<br>GPa | $T$ ,<br>K | $V$ ,<br>$\text{cm}^3\text{mol}^{-1}$ | $\alpha \times 10^6$ ,<br>$\text{K}^{-1}$ | $S$ ,<br>$\text{Jmol}^{-1}\text{K}^{-1}$ | $C_P$ ,<br>$\text{Jmol}^{-1}\text{K}^{-1}$ | $C_V$ ,<br>$\text{Jmol}^{-1}\text{K}^{-1}$ | $K_T$ ,<br>GPa | $K_S$ ,<br>GPa | $\Delta G$ ,<br>$\text{kJmol}^{-1}$ |
|--------------|------------|---------------------------------------|-------------------------------------------|------------------------------------------|--------------------------------------------|--------------------------------------------|----------------|----------------|-------------------------------------|
| 0.0001       | 298.15     | 40.300                                | 24.151                                    | 85.384                                   | 84.304                                     | 83.702                                     | 86.00          | 86.62          | -1655.531                           |
| 0.0001       | 500        | 40.529                                | 31.140                                    | 135.193                                  | 107.011                                    | 105.362                                    | 83.96          | 85.27          | -1678.027                           |
| 0.0001       | 1000       | 41.245                                | 37.854                                    | 215.976                                  | 123.959                                    | 119.335                                    | 78.23          | 81.26          | -1767.659                           |
| 0.0001       | 1398       | 41.900                                | 41.222                                    | 258.413                                  | 129.296                                    | 121.987                                    | 73.43          | 77.83          | -1862.474                           |
| 0.0001       | 2000       | 43.019                                | 46.461                                    | 305.799                                  | 135.683                                    | 123.439                                    | 65.93          | 72.47          | -2033.038                           |
| 3            | 298.15     | 39.000                                | 20.964                                    | 82.710                                   | 82.624                                     | 82.127                                     | 97.21          | 97.80          | -1536.635                           |
| 3            | 500        | 39.193                                | 27.167                                    | 131.719                                  | 105.663                                    | 104.285                                    | 95.25          | 96.51          | -1558.500                           |
| 3            | 1000       | 39.796                                | 32.891                                    | 211.692                                  | 122.818                                    | 118.954                                    | 89.74          | 92.66          | -1646.164                           |
| 3            | 1500       | 40.490                                | 36.112                                    | 262.739                                  | 128.818                                    | 122.169                                    | 83.95          | 88.52          | -1765.531                           |
| 3            | 2000       | 41.259                                | 39.240                                    | 300.412                                  | 133.233                                    | 123.324                                    | 77.99          | 84.25          | -1906.717                           |

**Table S2.** Thermodynamic functions of breyite at different pressures and temperatures.

| $P$ ,<br>GPa | $T$ ,<br>K | $V$ ,<br>$\text{cm}^3\text{mol}^{-1}$ | $\alpha \times 10^6$ ,<br>$\text{K}^{-1}$ | $S$ ,<br>$\text{Jmol}^{-1}\text{K}^{-1}$ | $C_P$ ,<br>$\text{Jmol}^{-1}\text{K}^{-1}$ | $C_V$ ,<br>$\text{Jmol}^{-1}\text{K}^{-1}$ | $K_T$ ,<br>GPa | $K_S$ ,<br>GPa | $\Delta G$ ,<br>$\text{kJmol}^{-1}$ |
|--------------|------------|---------------------------------------|-------------------------------------------|------------------------------------------|--------------------------------------------|--------------------------------------------|----------------|----------------|-------------------------------------|
| 0.0001       | 298.15     | 37.780                                | 21.924                                    | 80.428                                   | 87.549                                     | 87.123                                     | 78.60          | 78.98          | -1651.400                           |
| 0.0001       | 500        | 37.974                                | 27.984                                    | 131.881                                  | 109.814                                    | 108.671                                    | 76.88          | 77.69          | -1673.080                           |
| 0.0001       | 1000       | 38.573                                | 33.798                                    | 214.195                                  | 125.775                                    | 122.602                                    | 72.02          | 73.88          | -1761.511                           |
| 0.0001       | 1500       | 39.269                                | 37.730                                    | 266.505                                  | 132.257                                    | 126.655                                    | 66.81          | 69.77          | -1882.459                           |
| 0.0001       | 2000       | 40.058                                | 41.947                                    | 305.300                                  | 137.710                                    | 129.061                                    | 61.36          | 65.47          | -2025.810                           |
| 5            | 298.15     | 35.694                                | 17.168                                    | 76.876                                   | 85.309                                     | 85.002                                     | 97.99          | 98.34          | -1467.959                           |
| 5            | 500        | 35.838                                | 22.059                                    | 127.312                                  | 108.157                                    | 107.317                                    | 96.39          | 97.15          | -1488.806                           |
| 5            | 1000       | 36.282                                | 26.409                                    | 208.628                                  | 124.338                                    | 122.013                                    | 91.85          | 93.60          | -1574.668                           |
| 5            | 1500       | 36.788                                | 28.924                                    | 260.254                                  | 130.204                                    | 126.187                                    | 87.01          | 89.78          | -1692.660                           |
| 5            | 2000       | 37.346                                | 31.366                                    | 298.322                                  | 134.583                                    | 128.559                                    | 81.98          | 85.82          | -1832.708                           |
| 10           | 298.15     | 34.065                                | 14.168                                    | 74.161                                   | 83.555                                     | 83.317                                     | 116.44         | 116.77         | -1293.711                           |
| 10           | 500        | 34.179                                | 18.322                                    | 123.801                                  | 106.873                                    | 106.213                                    | 114.93         | 115.64         | -1313.919                           |
| 10           | 1000       | 34.529                                | 21.868                                    | 204.383                                  | 123.365                                    | 121.539                                    | 110.60         | 112.26         | -1397.812                           |
| 10           | 1500       | 34.926                                | 23.711                                    | 255.572                                  | 128.944                                    | 125.822                                    | 105.99         | 108.62         | -1513.570                           |
| 10           | 2000       | 35.357                                | 25.381                                    | 293.210                                  | 132.793                                    | 128.182                                    | 101.23         | 104.87         | -1651.170                           |

**Table S3.** Thermodynamic functions of larnite (Ca<sub>2</sub>SiO<sub>4</sub>) at different pressures and temperatures.

| $P$ ,<br>GPa | $T$ ,<br>K | $V$ ,<br>cm <sup>3</sup> mol <sup>-1</sup> | $\alpha \times 10^6$ ,<br>K <sup>-1</sup> | $S$ ,<br>Jmol <sup>-1</sup> K <sup>-1</sup> | $C_P$ ,<br>Jmol <sup>-1</sup> K <sup>-1</sup> | $C_V$ ,<br>Jmol <sup>-1</sup> K <sup>-1</sup> | $K_T$ ,<br>GPa | $K_S$ ,<br>GPa | $\Delta G$ ,<br>kJmol <sup>-1</sup> |
|--------------|------------|--------------------------------------------|-------------------------------------------|---------------------------------------------|-----------------------------------------------|-----------------------------------------------|----------------|----------------|-------------------------------------|
| 0.0001       | 298.15     | 51.880                                     | 29.925                                    | 124.047                                     | 130.523                                       | 129.069                                       | 105.00         | 106.18         | -2344.025                           |
| 0.0001       | 500        | 52.241                                     | 37.715                                    | 199.489                                     | 158.877                                       | 155.155                                       | 100.18         | 102.58         | -2377.087                           |
| 0.0001       | 1000       | 53.375                                     | 47.644                                    | 317.569                                     | 180.070                                       | 169.560                                       | 86.74          | 92.12          | -2509.143                           |
| 0.0001       | 1500       | 54.799                                     | 58.296                                    | 392.941                                     | 192.642                                       | 172.477                                       | 72.19          | 80.63          | -2687.831                           |
| 0.0001       | 2000       | 56.636                                     | 75.179                                    | 450.483                                     | 209.603                                       | 173.504                                       | 56.39          | 68.12          | -2899.176                           |
| 10           | 298.15     | 48.116                                     | 18.220                                    | 112.517                                     | 123.690                                       | 122.910                                       | 163.72         | 164.76         | -1845.671                           |
| 10           | 500        | 48.320                                     | 23.070                                    | 184.864                                     | 153.685                                       | 151.634                                       | 159.55         | 161.71         | -1876.052                           |
| 10           | 1000       | 48.945                                     | 27.642                                    | 299.353                                     | 173.924                                       | 168.391                                       | 147.95         | 152.81         | -1999.822                           |
| 10           | 1500       | 49.665                                     | 30.771                                    | 371.411                                     | 181.457                                       | 171.882                                       | 135.74         | 143.30         | -2168.601                           |
| 10           | 2000       | 50.477                                     | 34.191                                    | 424.461                                     | 187.653                                       | 173.121                                       | 123.13         | 133.46         | -2368.130                           |
| 15           | 298.15     | 46.777                                     | 15.305                                    | 108.561                                     | 121.256                                       | 120.631                                       | 191.06         | 192.05         | -1608.542                           |
| 15           | 500        | 46.944                                     | 19.475                                    | 179.824                                     | 151.946                                       | 150.281                                       | 187.09         | 189.16         | -1637.999                           |
| 15           | 1000       | 47.454                                     | 23.147                                    | 293.269                                     | 172.417                                       | 167.943                                       | 175.99         | 180.68         | -1758.951                           |
| 15           | 1500       | 48.034                                     | 25.348                                    | 364.606                                     | 179.269                                       | 171.661                                       | 164.34         | 171.63         | -1924.508                           |
| 15           | 2000       | 48.673                                     | 27.563                                    | 416.874                                     | 184.257                                       | 172.987                                       | 152.39         | 162.32         | -2120.444                           |

**Table S4.** Thermodynamic functions of titanite-structured CaSi<sub>2</sub>O<sub>5</sub> at different pressures and temperatures.

| $P$ ,<br>GPa | $T$ ,<br>K | $V$ ,<br>cm <sup>3</sup> mol <sup>-1</sup> | $\alpha \times 10^6$ ,<br>K <sup>-1</sup> | $S$ ,<br>Jmol <sup>-1</sup> K <sup>-1</sup> | $C_P$ ,<br>Jmol <sup>-1</sup> K <sup>-1</sup> | $C_V$ ,<br>Jmol <sup>-1</sup> K <sup>-1</sup> | $K_T$ ,<br>GPa | $K_S$ ,<br>GPa | $\Delta G$ ,<br>kJmol <sup>-1</sup> |
|--------------|------------|--------------------------------------------|-------------------------------------------|---------------------------------------------|-----------------------------------------------|-----------------------------------------------|----------------|----------------|-------------------------------------|
| 0.0001       | 298.15     | 48.190                                     | 19.961                                    | 101.151                                     | 132.729                                       | 131.710                                       | 178.00         | 179.38         | -2524.000                           |
| 0.0001       | 500        | 48.419                                     | 26.185                                    | 180.693                                     | 171.926                                       | 169.036                                       | 174.15         | 177.12         | -2552.795                           |
| 0.0001       | 1000       | 49.135                                     | 31.552                                    | 310.573                                     | 199.290                                       | 191.290                                       | 163.55         | 170.39         | -2678.568                           |
| 0.0001       | 1500       | 49.956                                     | 34.667                                    | 393.502                                     | 209.689                                       | 195.956                                       | 152.49         | 163.17         | -2855.810                           |
| 0.0001       | 2000       | 50.868                                     | 37.778                                    | 454.983                                     | 218.098                                       | 197.610                                       | 141.11         | 155.74         | -3068.567                           |
| 10           | 298.15     | 45.805                                     | 15.657                                    | 92.862                                      | 126.612                                       | 125.886                                       | 216.90         | 218.15         | -2054.525                           |
| 10           | 500        | 45.978                                     | 20.924                                    | 169.674                                     | 167.600                                       | 165.453                                       | 213.32         | 216.08         | -2081.332                           |
| 10           | 1000       | 46.521                                     | 25.217                                    | 297.126                                     | 196.111                                       | 190.095                                       | 203.36         | 209.80         | -2200.886                           |
| 10           | 1500       | 47.137                                     | 27.309                                    | 378.623                                     | 205.555                                       | 195.378                                       | 193.00         | 203.05         | -2371.039                           |
| 10           | 2000       | 47.807                                     | 29.174                                    | 438.680                                     | 212.109                                       | 197.265                                       | 182.41         | 196.13         | -2576.005                           |
| 15           | 298.15     | 44.803                                     | 14.124                                    | 89.495                                      | 124.016                                       | 123.388                                       | 235.67         | 236.87         | -1828.049                           |
| 15           | 500        | 44.957                                     | 19.038                                    | 165.139                                     | 165.751                                       | 163.859                                       | 232.19         | 234.87         | -1854.041                           |
| 15           | 1000       | 45.441                                     | 22.984                                    | 291.594                                     | 194.895                                       | 189.555                                       | 222.48         | 228.75         | -1971.032                           |
| 15           | 1500       | 45.988                                     | 24.785                                    | 372.570                                     | 204.116                                       | 195.117                                       | 212.37         | 222.17         | -2138.284                           |
| 15           | 2000       | 46.579                                     | 26.315                                    | 432.146                                     | 210.146                                       | 197.111                                       | 202.06         | 215.43         | -2340.104                           |

**Table S5.** Thermodynamic functions of cubic CaSiO<sub>3</sub>-perovskite at different pressures and temperatures.

| <i>P</i> ,<br>GPa | <i>T</i> ,<br>K | <i>V</i> ,<br>cm <sup>3</sup> mol <sup>-1</sup> | <i>α</i> ×10 <sup>6</sup> ,<br>K <sup>-1</sup> | <i>S</i> ,<br>Jmol <sup>-1</sup> K <sup>-1</sup> | <i>C<sub>P</sub></i> ,<br>Jmol <sup>-1</sup> K <sup>-1</sup> | <i>C<sub>V</sub></i> ,<br>Jmol <sup>-1</sup> K <sup>-1</sup> | <i>K<sub>T</sub></i> ,<br>GPa | <i>K<sub>S</sub></i> ,<br>GPa | Δ <i>G</i> ,<br>kJmol <sup>-1</sup> |
|-------------------|-----------------|-------------------------------------------------|------------------------------------------------|--------------------------------------------------|--------------------------------------------------------------|--------------------------------------------------------------|-------------------------------|-------------------------------|-------------------------------------|
| 0.0001            | 298.15          | 27.403                                          | 24.355                                         | 61.810                                           | 84.541                                                       | 83.383                                                       | 239.00                        | 242.32                        | -1567.400                           |
| 0.0001            | 500             | 27.562                                          | 31.873                                         | 112.581                                          | 109.904                                                      | 106.643                                                      | 232.88                        | 240.00                        | -1585.221                           |
| 0.0001            | 1000            | 28.057                                          | 38.133                                         | 195.994                                          | 128.876                                                      | 120.020                                                      | 217.07                        | 233.09                        | -1664.223                           |
| 0.0001            | 1500            | 28.623                                          | 41.666                                         | 250.009                                          | 137.735                                                      | 122.746                                                      | 201.11                        | 225.67                        | -1776.486                           |
| 0.0001            | 2000            | 29.250                                          | 45.132                                         | 290.723                                          | 145.739                                                      | 123.692                                                      | 185.02                        | 217.99                        | -1912.060                           |
| 10                | 298.15          | 26.364                                          | 20.177                                         | 55.857                                           | 80.058                                                       | 79.164                                                       | 279.40                        | 282.55                        | -1298.734                           |
| 10                | 500             | 26.493                                          | 27.053                                         | 104.657                                          | 106.812                                                      | 104.161                                                      | 273.49                        | 280.45                        | -1315.125                           |
| 10                | 1000            | 26.898                                          | 32.552                                         | 186.333                                          | 126.587                                                      | 119.229                                                      | 258.15                        | 274.08                        | -1389.659                           |
| 10                | 1500            | 27.359                                          | 35.228                                         | 239.312                                          | 134.737                                                      | 122.377                                                      | 242.71                        | 267.23                        | -1496.826                           |
| 10                | 2000            | 27.862                                          | 37.614                                         | 278.992                                          | 141.394                                                      | 123.480                                                      | 227.23                        | 260.19                        | -1626.798                           |
| 15                | 298.15          | 25.912                                          | 18.560                                         | 53.329                                           | 78.040                                                       | 77.244                                                       | 299.01                        | 302.09                        | -1168.058                           |
| 15                | 500             | 26.030                                          | 25.177                                         | 101.231                                          | 105.402                                                      | 102.983                                                      | 293.20                        | 300.08                        | -1183.835                           |
| 15                | 1000            | 26.401                                          | 30.418                                         | 182.141                                          | 125.637                                                      | 118.846                                                      | 278.03                        | 293.91                        | -1256.429                           |
| 15                | 1500            | 26.823                                          | 32.821                                         | 234.708                                          | 133.586                                                      | 122.197                                                      | 262.78                        | 287.28                        | -1361.394                           |
| 15                | 2000            | 27.281                                          | 34.877                                         | 274.002                                          | 139.804                                                      | 123.376                                                      | 247.52                        | 280.48                        | -1488.968                           |
| 100               | 298.15          | 21.327                                          | 7.355                                          | 30.312                                           | 55.876                                                       | 55.669                                                       | 601.09                        | 603.32                        | 810.944                             |
| 100               | 500             | 21.368                                          | 11.599                                         | 67.679                                           | 88.018                                                       | 87.161                                                       | 596.15                        | 602.01                        | 801.012                             |
| 100               | 1000            | 21.518                                          | 15.350                                         | 139.617                                          | 116.006                                                      | 113.054                                                      | 582.19                        | 597.39                        | 747.918                             |
| 100               | 1500            | 21.691                                          | 16.548                                         | 188.496                                          | 124.478                                                      | 119.417                                                      | 568.11                        | 592.19                        | 665.208                             |
| 100               | 2000            | 21.875                                          | 17.225                                         | 224.967                                          | 128.962                                                      | 121.770                                                      | 554.10                        | 586.83                        | 561.459                             |
